# Supplementary material for: A Cluster of Dengue Cases in Travelers: A Clinical Series From Thailand
Source: Preprints.org preprint supplement (doi:10.20944/preprints202107.0618.v1), 2021-07-28
Supplement: Supplementary file 1 [file supplementary]

**Appendix A**

**Figure A1.** Time fromdate of arrival in Bangkok until symptoms developed, indicated in red with the sequence reference number.

|  |  |
| --- | --- |
| (**a**) | (**b**) |
|  |  |
| (**c**) |  |

**Figure A2.** Spearman’s correlation analysis of heart rate and temperature, leukocyte count, and neutrophil count. (**a**) Temperature and heart rate; (**b**) Leukocyte count and heart rate; (**c**)Neutrophils and heart rate.

|  |  |
| --- | --- |
| (**a**) | (**b**) |
|  |  |
| (**c**) |  |

**Figure A3.** Spearman’s correlation of monocyte count with other white blood indices (**a**) Monocytes with lymphocytes; (**b**) Monocytes with neutrophils; (**c**) Monocytes with leukocytes.

**Table A1.** Descriptive analysis of the patient cohort.

|  | **Dengue infection (12)** | **Inpatient (9)** | **Outpatient (3)** | **p value** |
| --- | --- | --- | --- | --- |
| Exposure duration, days | 11.5 (8.7 – 17.0) | 13.50 (9.25 – 19.0) | 8 (4) | 0.295 |
| Age, years | 18.0 (16.2 – 22.2) | 17.0 (15.5 – 21.5) | 19 (16) | 0.576 |
| Body mass index kg/m2 | 22.7 (21.2 – 25.2) | 21.9 (21.0 – 24.1) | 24.68 (22.60) | 0.229 |
| Temperature o C | 39.1 (38.5 – 39.5) | 39.3 (38.7 – 39.5) | 38.80 (37.80) | 0.225 |
| Hear rate, beats per minute | 82.0 (68.5 – 95.5) | 82.0 (74.0 – 97.0) | 70 (60.00) | 0.192 |
| Mean arterial pressure, mmHg | 77.1 (71.5 – 90.0) | 74.6 (70.6 – 89.3) | 82.00 (79.33) | 0.166 |
| Day of presentation, days | 2.0 (1.2 – 2.7) | 2.0 (1.5 – 3.0) | 2 (1) | 0.370 |
| Dizziness | 2 (16.7) | 2 (22.2) | 0 | 1.000 |
| Relative bradycardia | 10 (83.3) | 8 (88.9) | 2 (66.7) | 0.455 |
| Hepatomegaly | 2 (16.7) | 2 (22.2) | 0 | 1.000 |
| Headache | 7 (58.3) | 7 (77.8) | 0 | **0.045** |
| Myalgia | 4 (33.3) | 3 (33.3) | 1 (33.3) | 1.000 |
| Rash | 4 (33.3) | 4 (44.4) | 0 | 0.491 |
| Bleeding | 2 (16.7) | 2 (22.2) | 0 | 1.000 |
| Loss of appetite | 4 (33.3) | 4 (44.4) | 0 | 0.491 |
| Nausea | 5 (41.7) | 5 (55.6) | 0 | 0.205 |
| Vomiting | 2 (16.7) | 1 (11.1) | 1 (33.3) | 0.455 |
| Abdominal pain | 1 (8.3) | 1 (11.1) | 0 | 1.000 |
| Diarrhea | 2 (16.7) | 2 (22.2) | 0 | 1.000 |
| Fatigue | 1 (8.3) | 1 (11.1) | 0 | 1.000 |
| Hemoglobin, g/dL | 14.70 (13.25 – 14.97) | 14.70 (13.30 – 14.95) | 13.80 (13.00) | 0.781 |
| Hematocrit, % | 43.40 (39.67 – 43.95) | 43.50 (40.95 – 44.35) | 39.90 (39.40) | 0.309 |
| Leukocytes /𝜇L | 3900 (2250 – 4800) | 3900 (2400 – 4800) | 2400 (1500) | 0.308 |
| Neutrophils /𝜇L | 2730 (1575 – 3465) | 2730 (1680 – 3675) | 1680 (1050) | 0.308 |
| Lymphocytes /𝜇L | 489 (253 – 705) | 572 (276 – 769) | 312 (210) | 0.229 |
| Monocytes /𝜇L | 150 (83 – 258) | 234 (91 – 308) | 126 (75) | 0.309 |
| Eosinophils /𝜇L | 0 (0 – 46) | 0 (0 – 39.50) | 0 (0 – 0) | 0.613 |
| Basophils /𝜇L | 68 (137 – 417) | 216 (138.45 – 426) | 408 (120) | 0.926 |
| Platelets /𝜇L | 173000 (134000 – 212500) | 174000 (136000 – 219500) | 164000 (82000) | 0.309 |
| AST /IUL | 36.50 (31.50 – 45.25) | 33 (22.50 – 40.50) | 40 (39) | 0.101 |
| ALT /IUL | 16.50 (13.25 – 59.00) | 17 (11 – 45) | 16 (14) | 0.653 |
| Ct value | 19.88 (18.86 – 25.44) | 19.95 (18.04 – 25.62) | 19.82 (19.82) | 0.770 |

The data are in median (IQR), including frequencies with percentages. In some variables, only the median and the 25th percentile are provided due to low number of cases. Inpatient refers to cases hospitalized and outpatient refers to cases not requiring hospitalization.

**Table A2.** Descriptive analysis of cases with dengue warning signs.

|  | **Warning signs (4)** | **No warning signs (8)** | **p value** |
| --- | --- | --- | --- |
| Exposure duration, days | 9.5 (8.2 – 10.7) | 16.0 (10.0 – 20.7) | 0.087 |
| Age, years | 15.5 (11.0 – 24.5) | 19.0 (17.0 – 22.2) | 0.230 |
| Body mass index kg/m2 | 21.1 (18.4 – 22.6) | 23.7 (22.6 – 27.1) | **0.042** |
| Temperature o C | 39.1 (37.7 – 39.4) | 39.1 (38.5 – 39.5) | 0.797 |
| Hear rate, beats per minute | 82.0 (71.0 – 91.0) | 81.0 (62.0 – 97.0) | 1.000 |
| Mean arterial pressure, mmHg | 71.8 (68.5 – 74.3) | 85.0 (76.0 – 95.4) | **0.017** |
| Day of presentation, days | 2.5 (2.0 – 4.5) | 2.0 (1.0 – 2.0) | 0.082 |
| Hospitalization, n (%) | 4 (100) | 5 (62.5) | 0.491 |
| Dizziness | 0 | 2 (25) | 0.515 |
| Relative bradycardia | 3 (75) | 7 (87.5) | 1.000 |
| Hepatomegaly | 2 (50) | 0 | 0.091 |
| Headache | 2 (50) | 5 (62.5) | 1.000 |
| Myalgia | 1 (25) | 3 (37.5) | 1.000 |
| Rash | 1 (25) | 3 (37.5) | 1.000 |
| Bleeding | 2 (50) | 0 | 0.091 |
| Loss of appetite | 3 (75) | 1 (12.5) | 0.067 |
| Nausea | 3 (75) | 1 (12.5) | 0.222 |
| Vomiting | 1 (25) | 1 (12.5) | 1.000 |
| Abdominal pain | 1 (25) | 0 | 0.333 |
| Diarrhea | 1 (25) | 1 (12.5) | 1.000 |
| Fatigue | 0 | 1 (12.5) | 1.000 |
| Hemoglobin, g/dL | 14.05 (12.35 – 14.92) | 14.75 (13.35 – 15.42) | 0.444 |
| Hematocrit, % | 43.05 (37.72 – 43.95) | 43.40 (39.67 – 44.42) | 0.865 |
| Leukocytes /𝜇L | 3050 (1900 – 3900) | 4100 (2450 – 5225) | 0.173 |
| Neutrophils /𝜇L | 2135 (1330 – 2730) | 2870 (1715 – 3692) | 0.173 |
| Lymphocytes /𝜇L | 502 (283 – 757) | 432 (235 – 705) | 0.734 |
| Monocytes /𝜇L | 133 (81 – 302) | 189 (87 – 258) | 0.734 |
| Eosinophils /𝜇L | 0 (0 – 43) | 0 (0 – 46) | 0.762 |
| Basophils /𝜇L | 303 (156 – 444) | 266 (132 – 417) | 0.734 |
| Platelets /𝜇L | 191000 (124500 – 212500) | 168000 (134000 – 217250) | 0.734 |
| AST /IUL | 30.5 (14) | 36.5 (32.5 – 154.25) | 0.739 |
| ALT /IUL | 41 (9) | 16.5 (13.75 – 97) | 0.737 |
| Ct value | 25.62 (25.62) | 19.75 (17.22 – 19.92) | 0.064 |

The data are in median (IQR), including frequencies with percentages. In some variables, only the median and the 25th percentile are provided due to low number of cases.

**Table A3.** Descriptive analysis by age group.

|  | **Adolescent (8)** | **Adults (4)** | **p value** |
| --- | --- | --- | --- |
| Exposure duration, days | 11.5 (9.7 – 16.0) | 14.0 (52.0 – 2.2) | 1.000 |
| Age, years | 17.0 (14.5 – 18.5) | 25.0 (20.7 – 30.7) | **0.006** |
| Body mass index kg/m2 | 21.9 (21.0 – 24.1) | 24.3 (22.9 – 29.5) | 0.062 |
| Temperature o C | 39.1 (38.8 – 39.5) | 38.8 (37.5 – 39.8) | 0.607 |
| Hear rate, beats per minute | 82.0 (65.5 – 97.0) | 75.0 (68.5 – 92.0) | 0.493 |
| Mean arterial pressure, mmHg | 74.8 (71.5 – 81.3) | 93.8 (75.4 – 104.7) | 0.126 |
| Day of presentation, days | 2.0 (2.0 – 2.7) | 1.5 (1.0 – 4.2) | 0.522 |
| Hospitalization, n (%) | 4 (100) | 5 (62.5) | 1.000 |
| Dizziness | 2 (25) | 0 | 0.515 |
| Relative bradycardia | 7 (87.5) | 3 (75) | 1.000 |
| Hepatomegaly | 1 (12.5) | 1 (25) | 1.000 |
| Headache | 5 (62.5) | 2 (50) | 1.000 |
| Myalgia | 2 (25) | 2 (50) | 0.547 |
| Rash | 2 (25) | 2 (50) | 0.547 |
| Bleeding | 1 (12.5) | 1 (25) | 1.000 |
| Loss of appetite | 3 (37.5) | 1 (25) | 1.000 |
| Nausea | 3 (37.5) | 2 (50) | 1.000 |
| Vomiting | 2 (25) | 0 | 0.515 |
| Abdominal pain | 1 (12.5) | 0 | 1.000 |
| Diarrhea | 2 (25) | 0 | 0.515 |
| Fatigue | 1 (12.5) | 0 | 1.000 |
| Hemoglobin, g/dL | 14.75 (13.25 – 14.97) | 14.25 (12.45 – 15.97) | 0.799 |
| Hematocrit, % | 43.55 (40.27 – 43.95) | 41.60 (37.12 – 47.12) | 0.610 |
| Leukocytes /𝜇L | 3250 (2500 – 4800) | 4100 (2450 – 5225) | 0.932 |
| Neutrophils /𝜇L | 2275 (1575 – 3465) | 2870 (1715 – 3692) | 0.932 |
| Lymphocytes /𝜇L | 559 (342 – 779) | 432 (235 – 705) | 0.308 |
| Monocytes /𝜇L | 135 (81.50 – 223.50) | 189 (87 – 258) | 0.308 |
| Eosinophils /𝜇L | 0 (0 – 50.37) | 0 (0 – 46) | 0.613 |
| Basophils /𝜇L | 312 (137.47 – 451.50) | 266 (132 – 417) | 0.396 |
| Platelets /𝜇L | 157000 (114000 – 204500) | 168000 (134000 – 217250) | 0.396 |
| AST /IUL | 39 (32.50 – 272) | 36.5 (32.5 – 154.25) | 0.297 |
| ALT /IUL | 17 (16.5 – 205) | 16.5 (13.75 – 97) | **0.024** |
| Ct value | 22.61 (17.29 – 25.80) | 19.75 (19.68) | 0.355 |

The data are in median (IQR), including frequencies with percentages. In some variables, only the median and the 25th percentile are provided due to low number of cases.
